# Supplementary material for: How non-bonding domains affect the active assembly of microtubule spools
Source: Royal Society of Chemistry journal article supplement (doi:10.1039/c9nr02059d), 2019-01-01
Supplement: c9nr02059d1.pdf [file c9nr02059d1.pdf]

## How non-bonding domains affect the active assembly of microtubule spools

*Haneen Martinez,<sup>a</sup> Virginia VanDelinder,<sup>a</sup> Zachary Imam,<sup>a</sup> Erik D. Spoerke,<sup>b</sup> and George D. Bachand <sup>\*a</sup>*

<sup>a</sup> Center for Integrated Nanotechnologies, Sandia National Laboratories, Albuquerque, NM USA

<sup>b</sup> Electronic, Optical, and Nano-Materials, Sandia National Laboratories, Albuquerque, NM USA

Corresponding Author

E-mail: [gdbacha@sandia.gov](mailto:gdbacha@sandia.gov).

## Supporting information

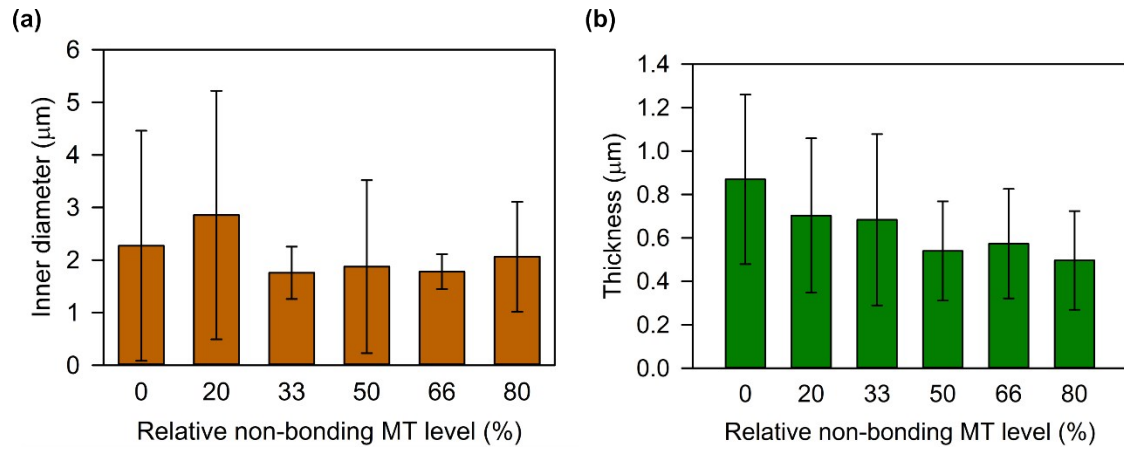

Fig. S1. (a) Average inner diameter of spools for each non-bonding MT level. (b) Average thickness of spools as measured by the difference between outer and inner radii. Number of measurements ( $n$ ) was 98, 101, 44, 29, 20, and 26 for 0, 20, 33, 50, 66, and 80% levels of non-bonding MTs, respectively. Error bars= standard deviation.

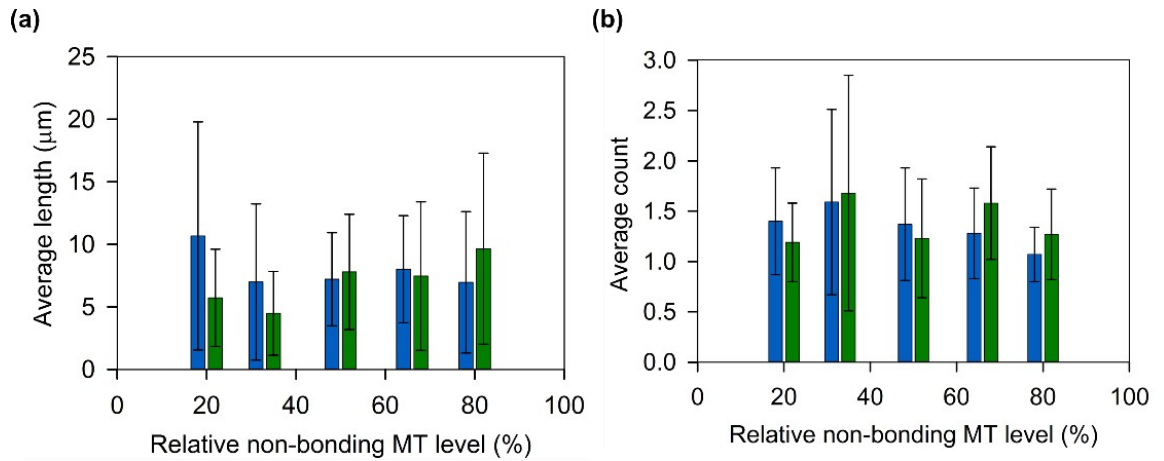

Fig. S2. Average (a) length and (b) count of bonding (blue bars) and non-bonding (green bars) domains in segmented MTs as a function of percent non-bonding MT level. Number of measurements for (a): blue bars =80, 70,70, 69 ,81 and green bars=68, 73, 64, 90, 95 for 0, 20, 33,50, 66, and 80% levels of non-bonding MTs, respectively. Number of measurements for (b) for blue and green was 7,44, 51, 56, 76 for 0, 20, 33,50, 66, and 80% levels of non-bonding MTs, respectively. Error bars = standard deviation. No significant differences in the average lengths and counts were observed.

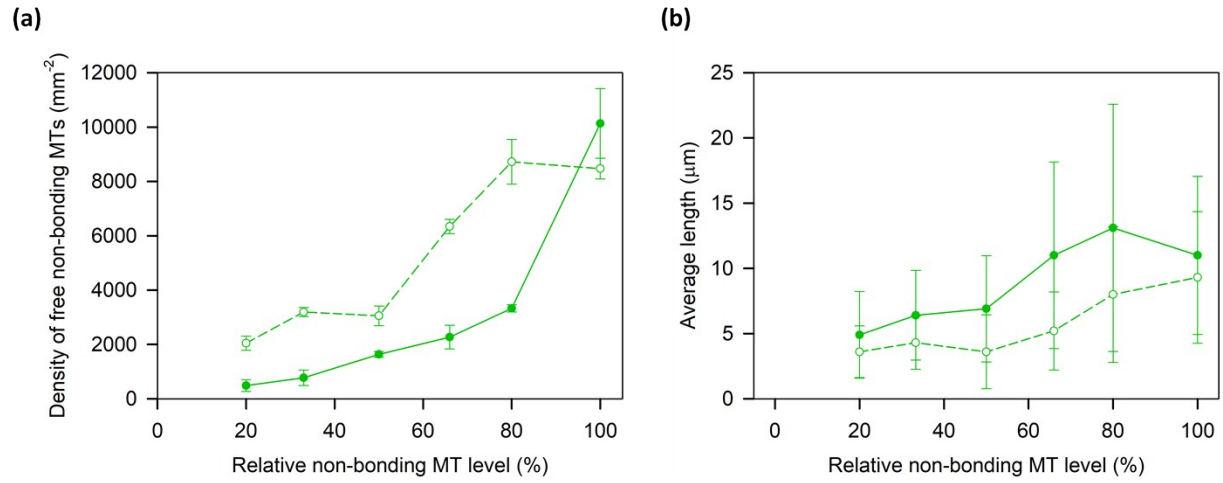

Fig. S3. The average density and length of free non-bonding MTs (i.e., not in spools) as a function of percent non-bonding MTs. (a) average density and (b) length were measured prior to (solid lines/closed circles,  $t=0$ ) and after adding sQDs (dashed lines/open circles,  $t=30\text{min}$ ) for non-bonding MTs. Number of measurements for each data point in (a) was 5 images. Number of measurements for (b) was: (i) solid line= 44,74,104,142,111,102; dashed line = 98,104,89,100,108,102 for 0, 20, 33,50, 66, and 80% levels of non-bonding MTs, respectively. Error bars= standard deviation.

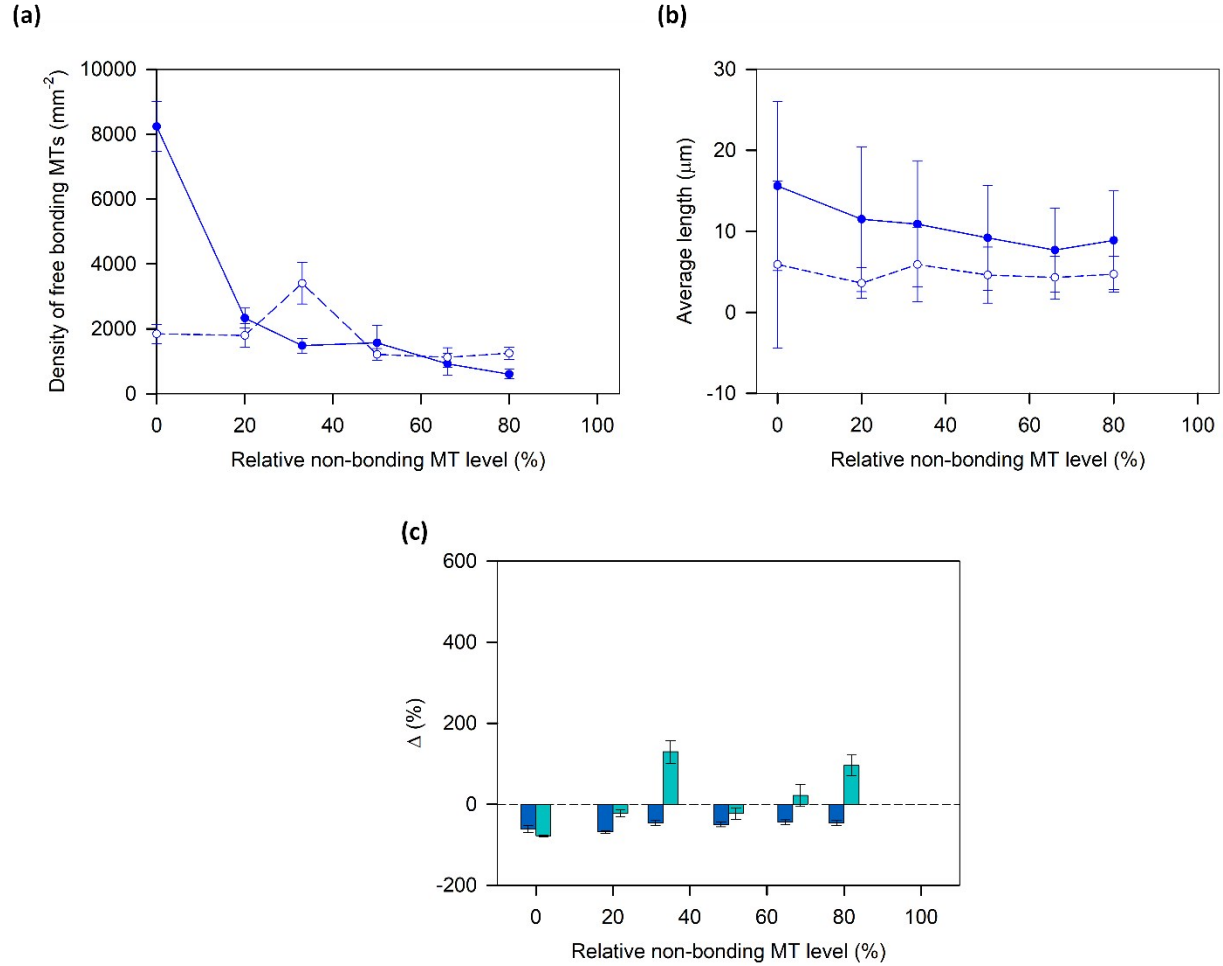

Fig. S4. The average density and length of bonding MTs as a function of non-bonding MT level. Average (a) density and (b) length were measured prior to (solid lines/closed circles,  $t=0$ ) and after adding sQDs (dashed lines/open circles,  $t=30$  min) for bonding MTs. Number of measurements for each data point in (a) was 5-6 images. Number of measurements for (b) was: (i) solid line = 90,80,74,85,74,58; dashed line = 74,88,129,75,77,54 for 0, 20, 33,50, 66, and 80% levels of non-bonding MTs, respectively. Error bars for (a) and (b)= standard deviation. (c) Change in the average density (■) and length (■) of unincorporated bonding MTs as a function of the non-bonding defective MT level. Changes in density were calculated as  $\Delta D = (D_{30} - D_0)/D_0 * 100$ ; changes in length were calculated using the same formula. Number of measurements is the same as (a) and (b). Error bars= standard error of the mean.

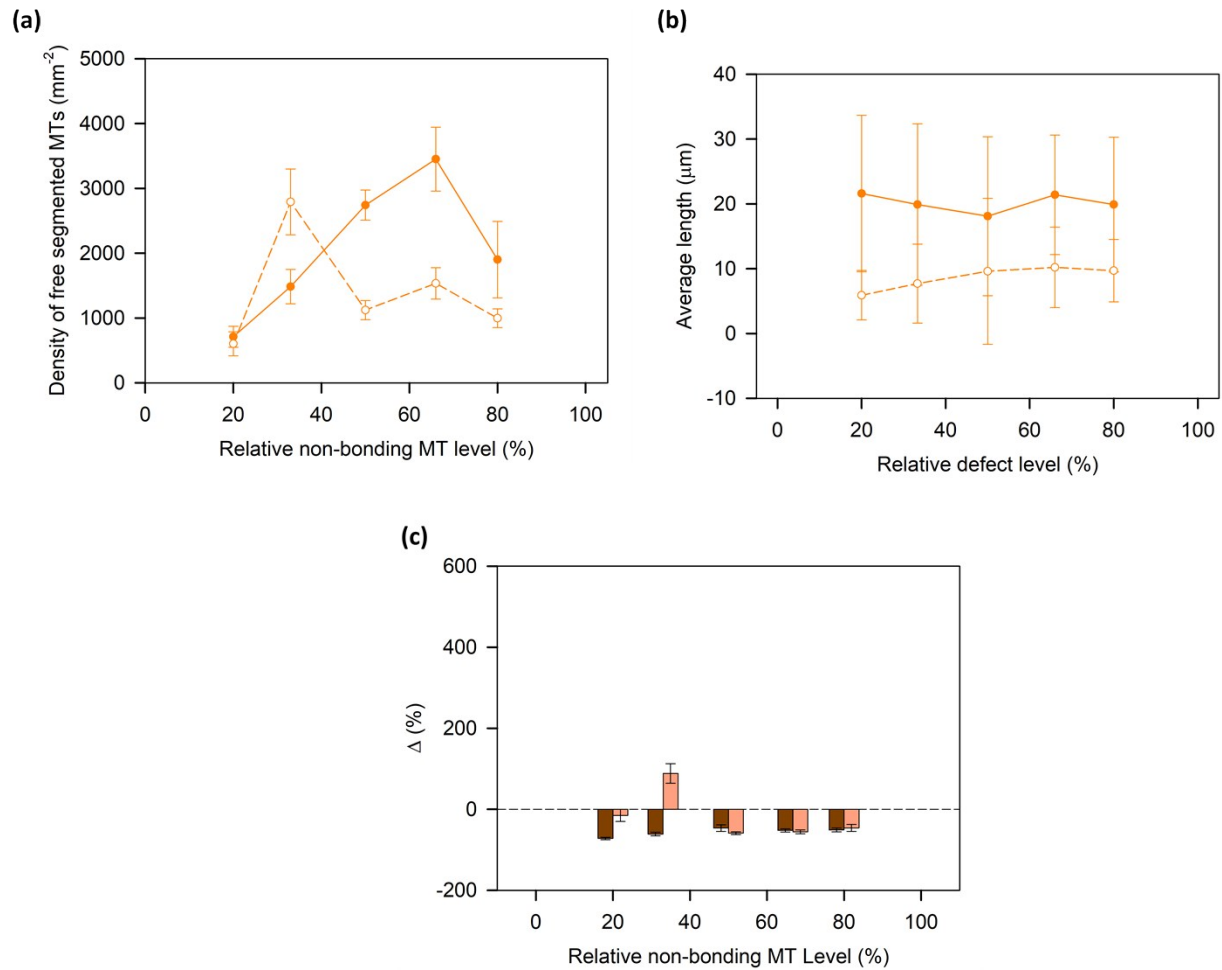

**Fig. S5.** The average density and length of segmented MTs as a function of non-bonding MT percent. Average (a) density and (b) length were measured prior to (solid lines/closed circles,  $t=0$ ) and after adding QDs (dashed lines/open circles,  $t=30$  min) for segmented MTs. Number of measurements for each data point in (a) was 5-6 images. Number of measurements for (b) was: (i) solid line=57,69,89,105,75; dashed line =58,76,75,79,47 for 0, 20, 33,50, 66, and 80% levels of non-bonding MTs, respectively. Error bars for (a) and (b)= standard deviation. (c) Change in the average density ( ■ ) and length ( ■ ) of segmented MTs as a function of the non-bonding defective MT level. Number of measurements is the same as (a) and (b). Error bars= standard error of the mean.
